# Supplementary material for: UVA Enhanced Promotive Effects of Blue Light on the Antioxidant Capacity and Anthocyanin Biosynthesis of Pak Choi
Source: MDPI journal article supplement (doi:10.3390/horticulturae8090850), 2022-09-17
Supplement: s1 [file s1]

**Table S1.** The exhibition of UVA (385 nm) and blue (460 nm) light treatment.

| Light treatment | UVA intensity<br>( $\mu\text{mol}\cdot\text{m}^{-2}\cdot\text{s}^{-1}$ ) | Blue intensity<br>( $\mu\text{mol}\cdot\text{m}^{-2}\cdot\text{s}^{-1}$ ) | Total intensity<br>( $\mu\text{mol}\cdot\text{m}^{-2}\cdot\text{s}^{-1}$ ) | Photoperiod<br>(h)   |
|-----------------|--------------------------------------------------------------------------|---------------------------------------------------------------------------|----------------------------------------------------------------------------|----------------------|
| T0              | 0                                                                        | 50                                                                        | 50                                                                         | 16/8<br>(light/dark) |
| T5              | 5                                                                        | 45                                                                        |                                                                            |                      |
| T10             | 10                                                                       | 40                                                                        |                                                                            |                      |
| T20             | 20                                                                       | 30                                                                        |                                                                            |                      |

**Note:** T0, T5, T10 and T20 means 0 UVA with 50 B, 5 UVA with 45 B, 10 UVA with 40 B, 20 UVA with 30 B ( $\mu\text{mol}\cdot\text{m}^{-2}\cdot\text{s}^{-1}$ ), respectively.

**Table S2.** A list of primer sequences for qRT-PCR analysis

| Primer name   | Primer sequence (5'-3')                                      | Gene bank accession |
|---------------|--------------------------------------------------------------|---------------------|
| <i>Actin</i>  | F: CTGTGACAATGGTACCGGAATG<br>R: ACAGCCCTGGGAGCATCA           | Bra022356           |
| <i>CRY1</i>   | F: TCCCCACCGAGTGGATACAT<br>R: GAAGGCGTGCTTTTGCTTCA           | DQ859033            |
| <i>CRY2</i>   | F: GACAAGAACGGCCAAGGAGA<br>R: ACTGCTCGTGAGTGAAAGGG           | AY176689            |
| <i>COP1</i>   | F: CGGAAGCGAGACAAATGAAGTAT<br>R: CGCAGTCAGCATCGTGGG          | JF738111            |
| <i>HY5</i>    | F: TCAGCACAGCAAGCAAGA<br>R: ATCAGCGTTAGAACCACC               | ES910808            |
| <i>MYB1</i>   | F: TGTAACAAAGCTGGGGAGAAG<br>R: CGTACCTTTTGGAACGAGCCCGTCA     | Bra001917           |
| <i>MYB2</i>   | F: AGGTGGTCTTTAATTGCT<br>R: TCCAAGGCATAGAGGAACAA             | Bra004162           |
| <i>PAP1</i>   | F: CTCTTCAACCCAACCCG<br>R: AGCAAACCTCTTCCACCACA              | Bra039763           |
| <i>TT8</i>    | F: TAGATACACACATGGACATG<br>R: TCTTTGACATTCTCAACTCTCCACGA     | Bra037887           |
| <i>PAL</i>    | F: AGCAAACCTCTTCCACCACA<br>R: CCATAACTATCAGTGCCTTTGC         | Bra005221           |
| <i>CHS</i>    | F: CTTTCGTCTTCCGTCAAGCGTCTCA<br>R: AAGTGTCCATCTATGGCACCGTCA  | Bra008792           |
| <i>CHI</i>    | F: TCAAGTTGATTCCGTTACTTTTCCA<br>R: ATGACGGTGAAGATCACAAACTTTC | Bra007142           |
| <i>F3H</i>    | F: CGAGCAGACTATCAATAG<br>R: ATATCTCTACTCATCTTTCTC            | Bra036828           |
| <i>DFR</i>    | F: GACGGCGTTTTCCACATAG<br>R: TCCCCAACACTCCATTAC              | Bra027457           |
| <i>ANS</i>    | F: GAAGACGAAACCATCCCGTGAGA<br>R: TTAGCCAACCTTACTTCCATACC     | Bra013652           |
| <i>UFGT</i>   | F: GTAATGTATCCGTGGTTAG<br>R: GGTAAGAGGTTAAGAGGTT             | Bra023594           |
| <i>TT19.1</i> | F: CTTGTAGCCATTTGGTCAA<br>R: GAGACTTGCCCCAAAAGGTTTCGT        | Bra008570           |
| <i>TT19.2</i> | F: TAGTCATCAAGCCCAGGTTAAGG<br>R: CGACGCAAGCCGATTCTC          | Bra023602           |

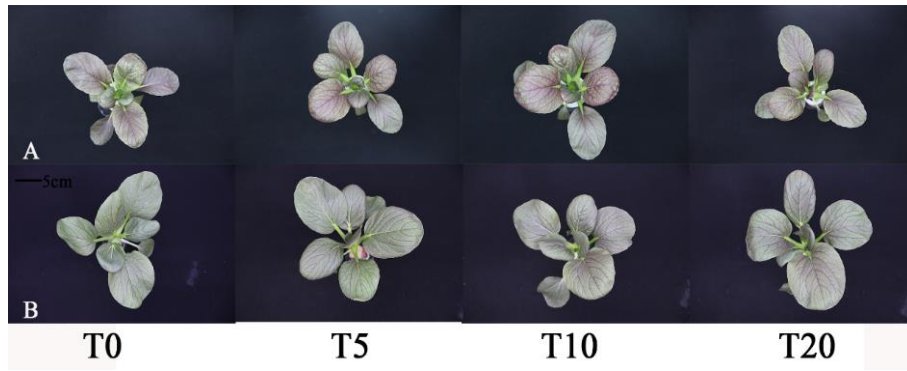

**Figure S1.** Effects of blue and UVA light on the canopies of red- (A) and purple-leaf (B) pak choi. T0, T5, T10 and T20 means 0 UVA with 50 B, 5 UVA with 45 B, 10 UVA with 40 B, 20 UVA with 30 B ( $\mu\text{mol}\cdot\text{m}^{-2}\cdot\text{s}^{-1}$ ), respectively.
